# Supplementary material for: Biochemical and functional analyses of gp130 mutants unveil JAK1 as a novel therapeutic target in human inflammatory hepatocellular adenoma
Source: PubMed Central journal article supplement — Oncoimmunology. 2014 Jan 3;2(12):e27090. doi: 10.4161/onci.27090 (PMC3913689; doi:10.4161/onci.27090), 2014-01-03
Supplement: onci-2-e27090-s01.pdf [file onci-2-e27090-s01.pdf]

## **Supplemental Material to:**

**Karine Poussin, Camilla Pilati, Gabrielle Couchy, Julien Calderaro, Paulette Bioulac-Sage, Yannick Bacq, Valérie Paradis, Emmanuelle Leteurtre, Nathalie Sturm, Jeanne Ramos, Catherine Guettier, Armelle Bardier-Dupas, Anais Boulai, Dominique Wendum, Janick Selves, Tina Izard, Jean-Charles Nault, and Jessica Zucman-Rossi**

**Biochemical and functional analyses of gp130 mutants unveil JAK1 as a novel therapeutic target in human inflammatory hepatocellular adenoma**

**Oncology 2013; 2(12)**

**<http://dx.doi.org/10.4161/onci.27090>**

**[http://www.landesbioscience.com/journals/oncoimmunology/  
article/27090/](http://www.landesbioscience.com/journals/oncoimmunology/article/27090/)**

Table S1

| n°ID      | Gender | age | Diagnosis | IL6ST (gp130) nucleotide change | IL6ST (gp130) amino acid change | CTNNB1 exon 3 Mutation Nc; AA |
|-----------|--------|-----|-----------|---------------------------------|---------------------------------|-------------------------------|
| CHC555T*  | F      | 41  | IHCA      | c.503_580del                    | p.Lys168_Asn193del              | NM                            |
| CHC691T*  | F      | 35  | IHCA      | c.518_532del                    | p.Lys173_Asp177del              | NM                            |
| CHC1342T  | F      | 40  | IHCA      | c.518_532del                    | p.Lys173_Asp177del              | NM                            |
| CHC786T*  | M      | 61  | biHCA     | c.551_559del                    | p.Val184_Ser187delinsAla        | c.13+9_399del; p.?            |
| CHC756T   | F      | 48  | biHCA     | c.552_566del                    | p.Asp185_Val189del              | c.121A>G; p.Thr41Ala          |
| CHC469T*  | F      | 32  | biHCA     | c.557_571del                    | p.Tyr186_Tyr190del              | c.100G>A; p.Gly34Arg          |
| CHC470T*  | F      | 32  | biHCA     | c.557_571del                    | p.Tyr186_Tyr190del              | c.100G>A; p.Gly34Arg          |
| CHC528T   | M      | 39  | IHCA      | c.557_571del                    | p.Tyr186_Tyr190del              | NM                            |
| CHC769T   | F      | 34  | IHCA      | c.557_571del                    | p.Tyr186_Tyr190del              | NM                            |
| CHC1121T* | F      | 25  | IHCA      | c.557_571del                    | p.Tyr186_Tyr190del              | NM                            |
| CHC1020T* | F      | 40  | IHCA      | c.557_571del                    | p.Tyr186_Tyr190del              | NM                            |
| CHC1350T  | F      | 44  | IHCA      | c.557_571del                    | p.Tyr186_Tyr190del              | NM                            |
| CHC1386T  | F      | 44  | IHCA      | c.557_571del                    | p.Tyr186_Tyr190del              | NM                            |
| CHC821T   | F      | 46  | IHCA      | c.557_571del                    | p.Tyr186_Tyr190del              | NM                            |
| CHC955T   | F      | 38  | IHCA      | c.556_571delinsA                | p.Tyr186_Phe191delinsIle        | NM                            |
| CHC390T*  | M      | 49  | IHCA      | c.557_574del                    | p.Tyr186_Val192delinsPhe        | NM                            |
| CHC344T*  | F      | 39  | IHCA      | c.560_571del                    | p.Ser187_Tyr190del              | NM                            |
| CHC362T*  | F      | 54  | IHCA      | c.560_571del                    | p.Ser187_Tyr190del              | NM                            |
| CHC382T*  | F      | 40  | IHCA      | c.560_571del                    | p.Ser187_Tyr190del              | NM                            |
| CHC466T*  | F      | 50  | IHCA      | c.560_571del                    | p.Ser187_Tyr190del              | NM                            |
| CHC581T   | F      | 51  | IHCA      | c.560_571del                    | p.Ser187_Tyr190del              | NM                            |
| CHC820T   | F      | 46  | biHCA     | c.560_571del                    | p.Ser187_Tyr190del              | c.116C>G; p.Ala39Gly          |
| CHC670T*  | F      | 38  | IHCA      | c.560_571del                    | p.Ser187_Tyr190del              | NM                            |
| CHC823T   | F      | 46  | biHCA     | c.560_571del                    | p.Ser187_Tyr190del              | c.116C>G; p.Ala39Gly          |
| CHC975T   | F      | 50  | IHCA      | c.560_571del                    | p.Ser187_Tyr190del              | NM                            |
| CHC751T   | F      | 39  | IHCA      | c.560_571del                    | p.Ser187_Tyr190del              | NM                            |
| CHC1434T  | F      | 38  | IHCA      | c.560_571del                    | p.Ser187_Tyr190del              | NM                            |
| CHC1329T  | F      | 40  | IHCA      | c.560_571del                    | p.Ser187_Tyr190del              | NM                            |
| CHC772T   | F      | 34  | IHCA      | c.562_573del                    | p.Thr188_Phe191del              | NM                            |
| CHC745T   | F      | 42  | IHCA      | c.562_573del                    | p.Thr188_Phe191del              | NM                            |
| CHC858T   | F      | 51  | IHCA      | c.563_574del                    | p.Thr188_Val192delinsIle        | NM                            |
| CHC552T*  | F      | 54  | IHCA      | c.563_574del                    | p.Thr188_Val192delinsIle        | NM                            |
| CHC1232T* | F      | 36  | IHCA      | c.563_574del                    | p.Thr188_Val192delinsIle        | NM                            |
| CHC594T   | F      | 37  | IHCA      | c.563_574del                    | p.Thr188_Val192delinsIle        | NM                            |
| CHC680T   | F      | 41  | IHCA      | c.563_577del                    | p.Thr188_Val192del              | NM                            |
| CHC364T*  | F      | 35  | IHCA      | c.565_576del                    | p.Val189_Val192del              | NM                            |
| CHC377T*  | F      | 42  | IHCA      | c.565_576del                    | p.Val189_Val192del              | NM                            |
| CHC455T   | F      | 27  | IHCA      | c.565_576del                    | p.Val189_Val192del              | NM                            |
| CHC456T   | F      | 27  | IHCA      | c.565_576del                    | p.Val189_Val192del              | NM                            |
| CHC473T   | F      | 37  | IHCA      | c.564_575del                    | p.Val189_Val192del              | NM                            |
| CHC771T*  | F      | 34  | IHCA      | c.564_575del                    | p.Val189_Val192del              | NM                            |

|           |   |    |       |                    |                             |                                   |
|-----------|---|----|-------|--------------------|-----------------------------|-----------------------------------|
| CHC684T   | F | 29 | IHCA  | c.565_576del       | p.Val189_Val192del          | NM                                |
| CHC1131T  | F | 30 | bIHCA | c.564_576delinsA   | p.Val189_Val192del          | c.121A>G; p.Thr41Ala              |
| CHC1237T  | F | 41 | IHCA  | c.565_574delinsT   | p.Val189_Val192delinsPhe    | NM                                |
| CHC536T   | F | 46 | IHCA  | c.566_577del       | p.Val189_Asn193delinsAsp    | c.94G>A; p.Asp32Asn               |
| CHC503T   | F | 49 | IHCA  | c.566_580delinsATG | p.Val189_Ile194delinsAspVal | NM                                |
| CHC1328T  | F | 40 | IHCA  | c.567_578del       | p.Tyr190_Asn193del          | NM                                |
| CHC698T   | F | 31 | IHCA  | c.568_579del       | p.Tyr190_Asn193del          | NM                                |
| CHC1331T  | F | 40 | IHCA  | c.567_578del       | p.Tyr190_Asn193del          | NM                                |
| CHC973T   | F | 52 | IHCA  | c.569_578delinsC   | p.Tyr190_Asn193delinsSer    | NM                                |
| CHC976T   | M | 63 | IHCA  | c.570_578del       | p.Phe191_Asn193del          | NM                                |
| CHC1124T* | M | 50 | bIHCA | c.571_579del       | p.Phe191_Asn193del          | c.121A>G; p.Thr41Ala              |
| CHC1238T* | F | 41 | IHCA  | c.573_582delinsG   | p.Phe191_Ile194delinsLeu    | NM                                |
| CHC867T*  | F | 38 | IHCA  | c.583_588del       | p.Glu195_Val196del          | NM                                |
| CHC481T   | F | 30 | IHCA  | c.616_645dup       | p.Lys206_Asp215dup          | NM                                |
| CHC1433T  | F | 38 | IHCA  | c.618_641dup       | p.Asn213_Phe214ins8         | NM                                |
| CHC1023T* | M | 35 | bIHCA | c.646_647ins33     | p.Asp215_Pro216ins11        | c.121A>G; p.Thr41Ala              |
| CHC1275T  | F | 40 | bIHCA | c.643_645del       | p.Asp215del                 | c.121A>G; p.Thr41Ala              |
| CHC1301T  | F | 43 | IHCA  | c.643_645del       | p.Asp215del                 | NM                                |
| CHC711T*  | F | 26 | bIHCA | c.643_645del       | p.Asp215del                 | c.121A>G; p.Thr41Ala              |
| CHC754T   | M | 29 | bIHCA | c.647C>A           | p.Pro216His                 | c.69_425del;<br>p.His24_Tyr142del |
| CHC839T   | F | 46 | IHCA  | c.647C>A           | p.Pro216His                 | NM                                |
| CHC974T   | F | 42 | bIHCA | c.647C>A           | p.Pro216His                 | c.134C>T; p.Ser45Phe              |
| CHC1123T  | F | 46 | IHCA  | c.647C>A           | p.Pro216His                 | NM                                |
| CHC979T   | M | 58 | bIHCA | c.646_648del       | p.Pro216del                 | c.97T>C; p.Ser33Pro               |
| CHC1337T  | F | 46 | IHCA  | c.1252_1263del     | p.Ala418_Phe421del          | NM                                |

\*previously described in Rebouissou et al, Nature 2009

Table S2

| Mutant ID                            | Localization (cDNA)                     | Primer sequence (5' To 3')                                                | Primer name   |
|--------------------------------------|-----------------------------------------|---------------------------------------------------------------------------|---------------|
| <b>S187</b>                          | c.559_710del                            | CCCACCTCATGCACTGTTGATTATTTTGTCAACATTGAAGTCTG                              | S187 S        |
|                                      |                                         | CAGACTTCAATGTTGACAAAATAATCAACAGTGCATGAGGTGGG                              | S187 AS       |
| <b>Y186</b>                          | c.556_570 del                           | CCACCTCATGCACTGTTGATTTTGTCAACATTGAAGTCTG                                  | Y186 S        |
|                                      |                                         | CAGACTTCAATGTTGACAAAATAATCAACAGTGCATGAGGTGGG                              | Y186 AS       |
| <b>V189</b>                          | c.565_576del                            | CATGCACTGTTGATTATTCTACTAACATTGAAGTCTGGGTAGAAGC                            | V189 S        |
|                                      |                                         | GCTTCTACCCAGACTTCAATGTTAGTAGAATAATCAACAGTGCATG                            | V189 AS       |
| <b>K173</b>                          | c.517_531del                            | CAAGTTTGCTGATTGCACCCCCACCTCATGCA                                          | K173 S        |
|                                      |                                         | TGCATGAGGTGGGGGTGCAATCAGCAAACCTG                                          | K173 AS       |
| <b>P216</b>                          | c.647C>A                                | CATCAGATCATATCAATTTTGTATCATGTATATAAAGTGAAGCCCAATCC                        | P216H S       |
|                                      |                                         | GGATTGGGCTTCACTTTATATACATGATCAAAATTGATATGATCTGATG                         | P216H AS      |
| <b>D215</b>                          | c.643_645del                            | GGAAGGTTACATCAGATCATATCAATTTTCTGTATATAAAGTGAAG                            | D215 S        |
|                                      |                                         | CTTCACTTTATATACAGGAAAATTGATATGATCTGATGTAACCTTCC                           | D215 AS       |
| <b>E195</b>                          | c.583_588del                            | TGATTATTCTACTGTGTATTTTGTCAACATTTGGGTAGAAGCAGAGA                           | E195 S        |
|                                      |                                         | TCTCTGCTTCTACCCAAATGTTGACAAAATACACAGTAGAATAATCA                           | E195 AS       |
| <b>V184</b>                          | c.550_558del, 560T>A                    | GACACCCCCACCTCATGCACTGCTACTGTGTATTTTGTCA                                  | V184 S        |
|                                      |                                         | TGACAAAATACACAGTAGCATGCATGAGGTGGGGGTGTC                                   | V184 AS       |
| <b>A418</b>                          | c.1252_1263del                          | CAGCTGTTTTAACTATCCCTCAAGCTACTCACCTGTAAT                                   | A418 S        |
|                                      |                                         | ATTACAGGGTGAGTAGCTTGAGGGATAGTTAAAACAGCTG                                  | A418 AS       |
| <b>Y759F</b>                         | c.2276A>T                               | TCGAGCACTGTCCAGTTTTCTACCGTGGTACAC                                         | Y759F S       |
|                                      |                                         | GTGTACCACGGTAGAAAACCTGGACAGTGCTCGA                                        | Y759F AS      |
| <b>S782A</b>                         | c.2344T>G                               | CTTCTCAAGATCCGAGGCTACCCAGCCCTTGTT                                         | S782A S       |
|                                      |                                         | AACAAGGGCTGGGTAGCCTCGGATCTTGAGAAG                                         | S782A AS      |
| <b>L786A_L787A</b><br><b>(LL/AA)</b> | c.2356T>G, 2357T>C,<br>2359T>G, 2360T>C | CCGAGTCTACCCAGCCCGCGGAGATTGAGAGGAGCGGC                                    | LL/AA S       |
|                                      |                                         | GCCGCTCCTCTGAATCTGCCGCGGGCTGGGTAGACTCGG                                   | LL/AA AS      |
| <b>Flag tag</b>                      | c.2752ins                               | GGCGGCTACATGCCTCAGGATTACAAGGATGACGATGACAAGTGAAGGACTAG<br>TAGTTCC          | IL6ST Flag S  |
|                                      |                                         | GGAAGTACTAGTCTTCACTTGTGCATCGTCATCCTTGAATCCTGAGGCATGTAG<br>CCGCC           | IL6ST Flag AS |
| <b>Myc tag</b>                       | c.2752ins                               | AAGGCGGCTACATGCCTCAGGAACAAAACTTATTTCTGAAGAAGATCTGTGAA<br>GGACTAGTAGTTCCTG | IL6ST Myc S   |
|                                      |                                         | CAGGAAGTACTAGTCTTACAGATCTTCTCAGAAAATAAGTTTTTGTTCCTGAG<br>GCATGTAGCCGCCTT  | IL6ST Myc AS  |

Table S3

| Target gene                                     | si RNA ID                                       | Sequence (5' to 3')                             | Strand           |
|-------------------------------------------------|-------------------------------------------------|-------------------------------------------------|------------------|
| Human interleukine 6 receptor (hIL6R)           | s7316                                           | AGACUACGGUUUGAGCUCATT                           | sens             |
|                                                 |                                                 | UGAGCUCAAACCGUAGUCUGT                           | antisens         |
|                                                 | s7315                                           | CCACGACUCUGGAAACUAUTT<br>AUAGUUUCCAGAGUCGUGGAG  | sens<br>antisens |
| s7314                                           | CAACAUGGAUGGUCAAGGATT<br>UCCUUGACCAUCCAUGUUGTG  | sens<br>antisens                                |                  |
| Human interleukine 6 signal transducer (hIL6ST) | s229006                                         | CACUGUUGAUUUAUUCUACUTT                          | sens             |
|                                                 |                                                 | AGUAGAAUAAUCAACAGUGCA                           | antisens         |
|                                                 | s229007                                         | CUGUUGAUUUAUUCUACUGUTT<br>ACAGUAGAAUAAUCAACAGTG | sens<br>antisens |
| s229008                                         | UGUUGAUUUAUUCUACUGUGTT<br>CACAGUAGAAUAAUCAACAGT | sens<br>antisens                                |                  |
| Human Oncostatin M receptor (hOSMR)             | s17544                                          | CCAGAUCAGUAGGAUUGAATT                           | sens             |
|                                                 |                                                 | UUCAUCCUACUGAUCUGGAT                            | antisens         |
|                                                 | s17542                                          | GUAACUGCAUUAACUUGATT<br>UCAAGUUGAAUGCAGUUACAT   | sens<br>antisens |
| s17543                                          | GACUCACAAGAAACCUAUATT<br>UAUAGGUUUCUUGUGAGUCTT  | sens<br>antisens                                |                  |
| Human Janus kinase 1 (hJAK1)                    | s7646                                           | CCAUCACCGUUGAUGACAATT                           | sens             |
|                                                 |                                                 | UUGUCAUCAACGGUGAUGGTG                           | antisens         |
|                                                 | s7647                                           | GUAUUUAGCUCAUCAUGGAtt<br>UCCAUGAUGAGCUUAAUACca  | sens<br>antisens |
| s7648                                           | GGUGCUGUCUAGGCAAGAAtt<br>UUCUUGCCUAGACAGCACGgt  | sens<br>antisens                                |                  |
| Human Janus kinase 2 (hJAK2)                    | s7649                                           | CAAAGAUCCAAGACUAUCAtt                           | sens             |
|                                                 |                                                 | UGAUAGUCUUGGAUCUUUGct                           | antisens         |
|                                                 | s7650                                           | GGACUGUAUGUACUUCGAUtt<br>AUCGAAGUACAUACAGUCCag  | sens<br>antisens |
| s7651                                           | CCAGCGGAAUUUAUGCGUAtt<br>UACGCAUAAAUCCGCUGGtg   | sens<br>antisens                                |                  |
| Human Tyrosine kinase 2 (hTyk2)                 | s14535                                          | GAUGCUAUUUUCCGCAUAtt                            | sens             |
|                                                 |                                                 | UAUGCGGAAUUAUAGCAUCag                           | antisens         |
|                                                 | s14536                                          | CAUCCACAUUGCACAUAAAtt<br>UUUAUGUGCAAUGUGGAUGca  | sens<br>antisens |
| s14537                                          | GGAGUAUAAGUUCUACUAtt<br>AUAGUAGAACUUUACUCctt    | sens<br>antisens                                |                  |

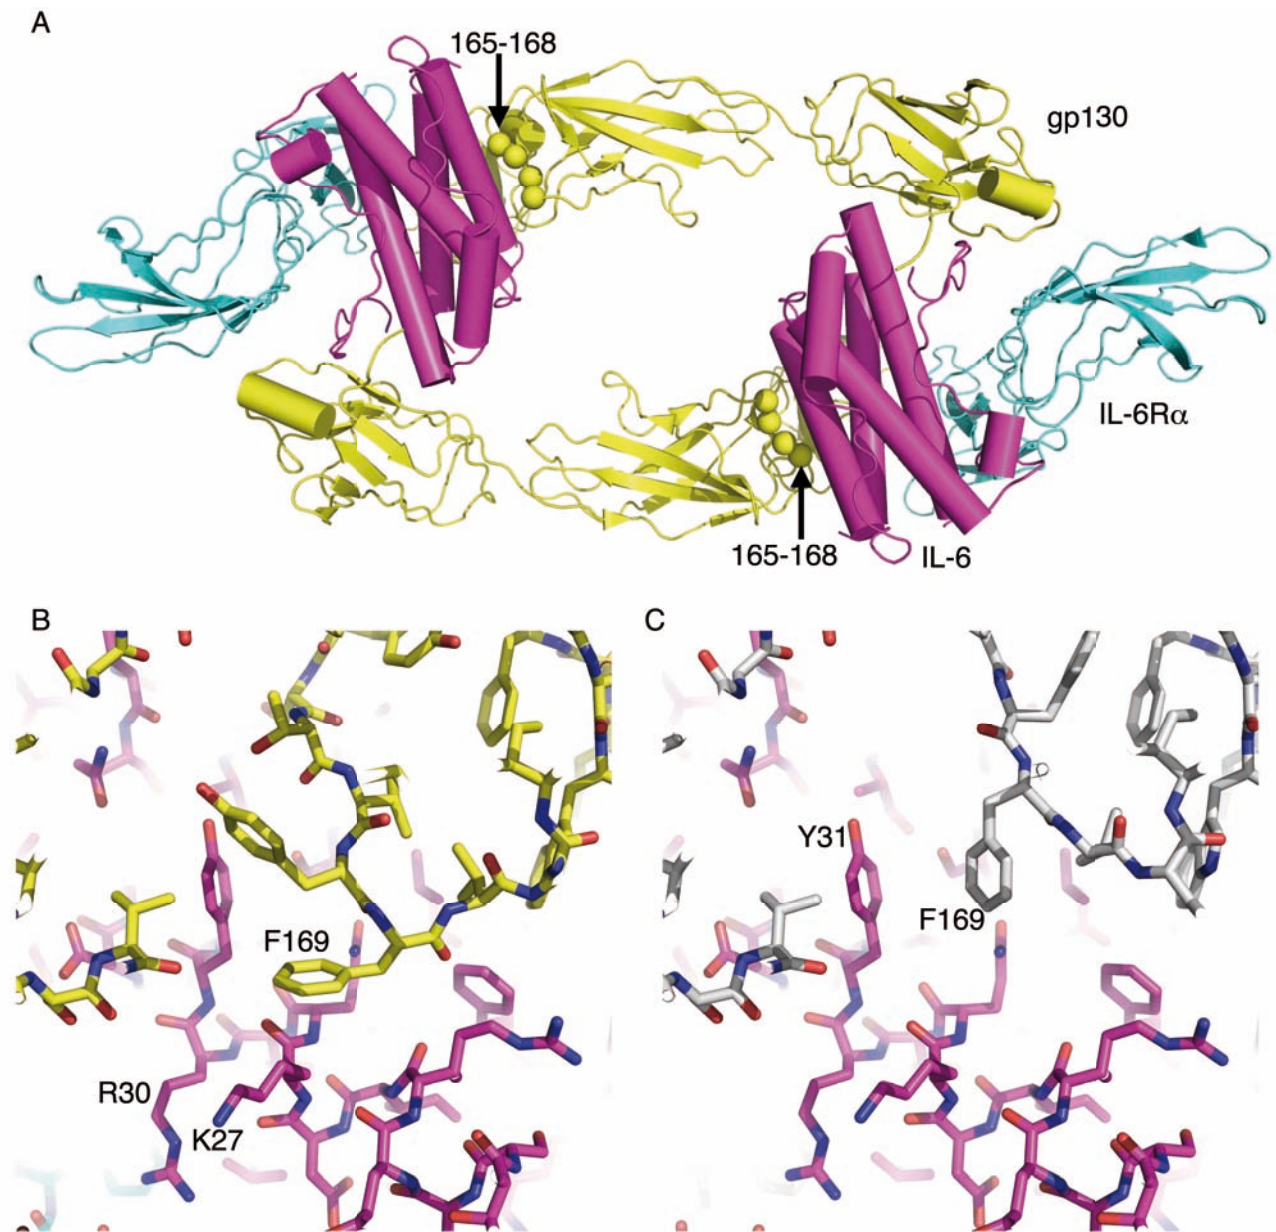

**Supplementary Figure S1. Position of the mutations in D2 domain according to the hexameric IL-6/IL-6R/gp130 structure.** **A.** Structure (PDB entry 1p9m) of the hexameric IL-6 (both molecules within the hexamer are shown in magenta) bound to IL6-R $\alpha$  (cyan) in complex with gp130 (yellow). The arrow points to the gp130 residue 168; C $\alpha$  positions of gp130 residues 165-168 are indicated by yellow spheres. **B.** Close-up view of IL-6 (magenta) interactions with gp130 (yellow). **C.** Close-up view of IL-6 (magenta) interactions with an energy minimized model of gp130 $\Delta$ 165-168 (gray). IL-6 is in the same orientation as shown in panel (B). The numbering of residues corresponds to the *IL6ST* complementary DNA, which has 22 additional amino-terminal residues compared with the polypeptide chain due to the peptide signal.

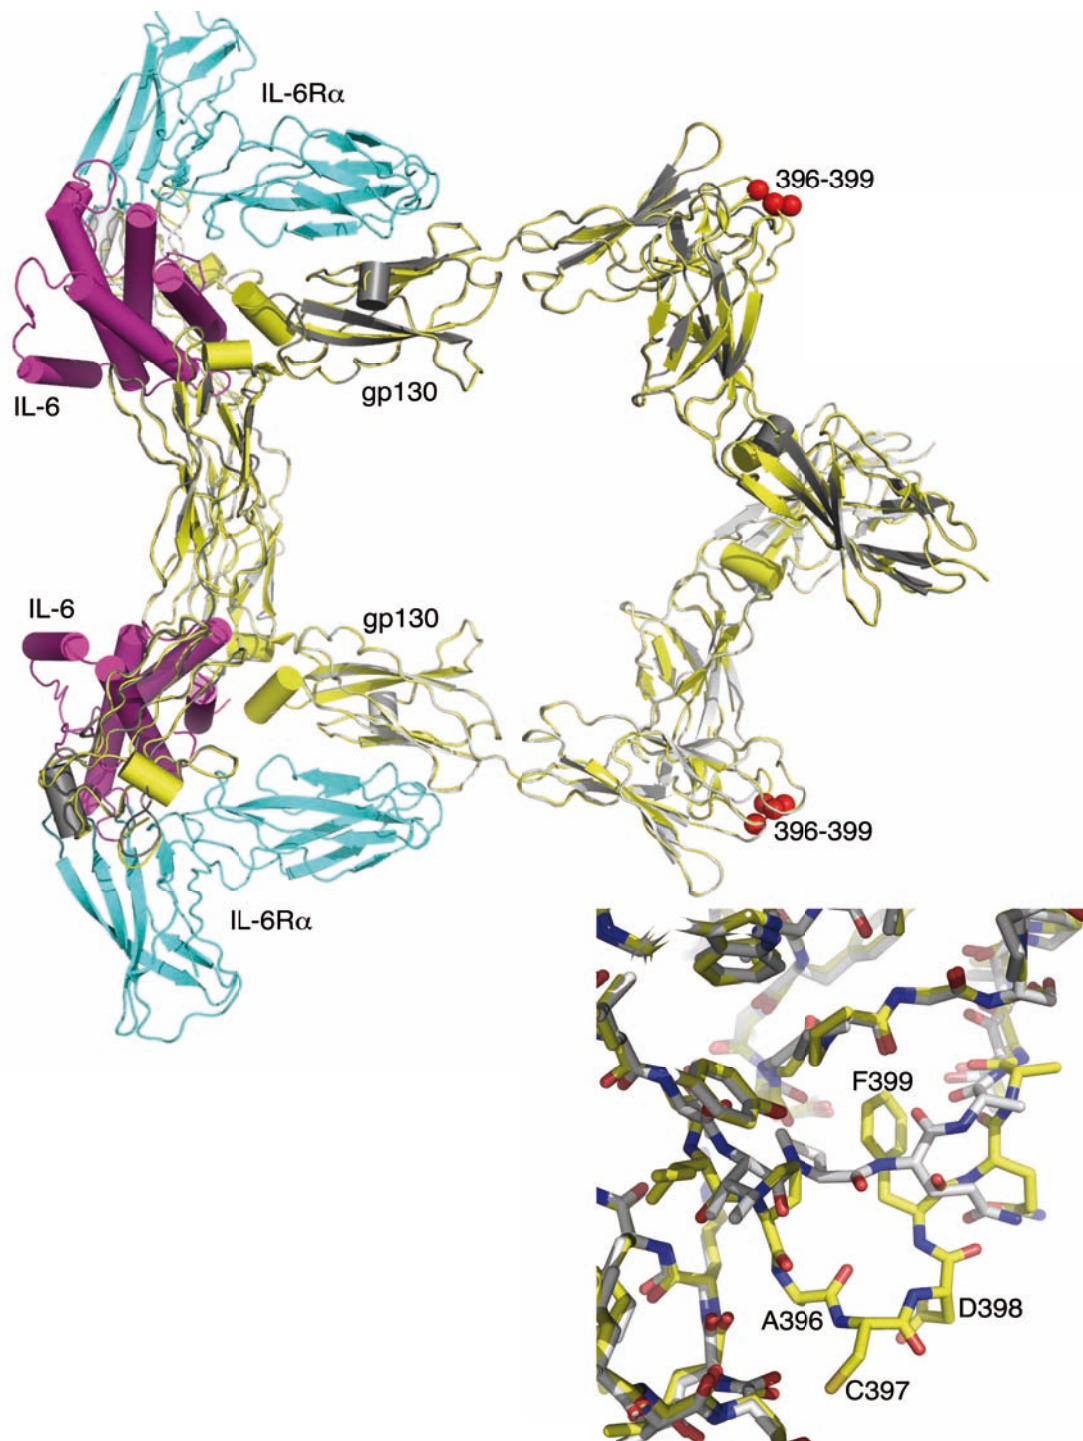

**Supplementary Figure S2. Mutations in the structure of the entire extracellular gp130 domain.** Superposition of the IL-6/IL6-Rα/gp130 hexamer (PDB entry 1p9m) onto the structure of the entire extracellular gp130 domains (PDB entry 3l5h) and onto our energy-minimized model of gp130 deletion of residues 396-399. IL-6, magenta; IL6-Rα, cyan; gp130, yellow; gp130 396-399 deletion, grey. The gp130 deleted residues 396-399 are indicated by red spheres for their C $\alpha$  positions in the main Figure and are labeled in the Figure inset. The numbering of residues corresponds to the *IL6ST* complementary DNA, which has 22 additional amino-terminal residues compared with the polypeptide chain due to the peptide signal.

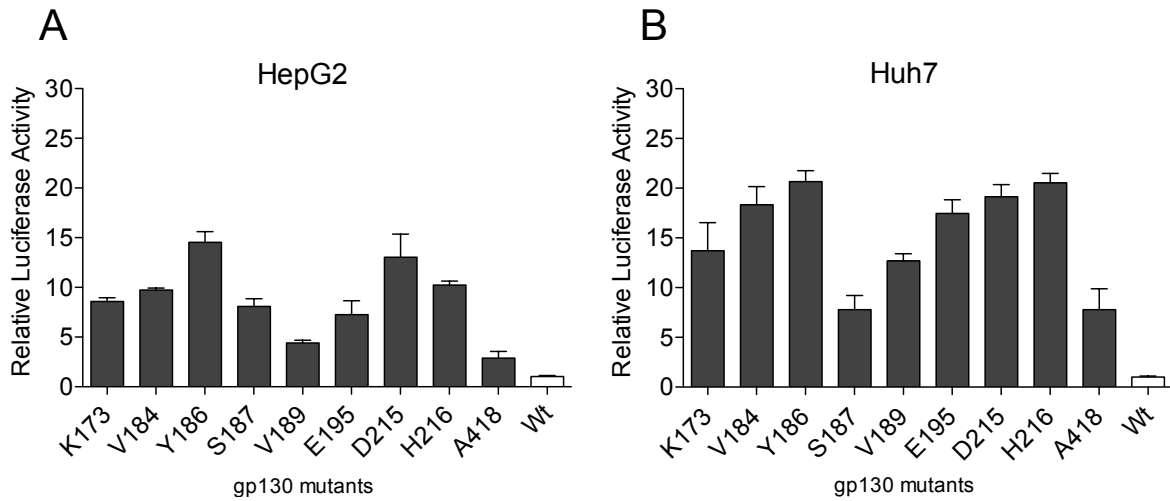

**Supplementary Figure S3. Activity of IHCA gp130 mutants in hepatocellular cells.** Expression vectors harboring nine different gp130 mutants identified in IHCA or wild type gp130 (Wt) were transfected into HepG2 (A) or Huh7 (B) cells expressing a STAT3-driven luciferase (Luc) reporter construct. STAT3 activation was measured after 6 hr of serum starvation. Shown is the Luc activity (mean) determined from triplicate co-transfections ( $\pm$  SD) relative to Wt gp130.



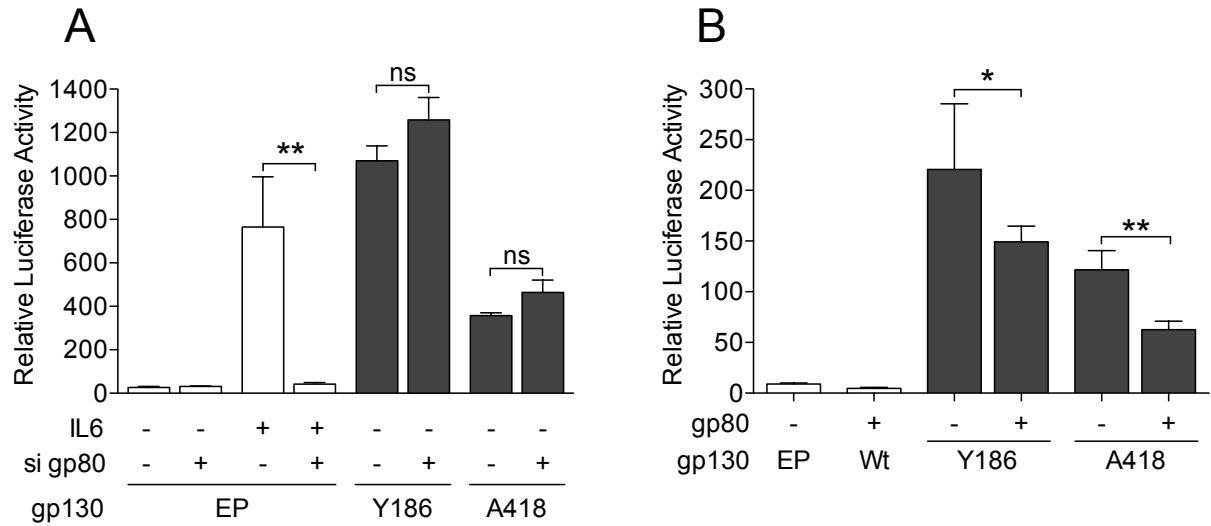

**Supplementary Figure S4. Role of gp80 on gp130 mutant activity.** **A.** gp130 mutants (Y186 and A418) or empty vector (EP) were co-transfected with gp80 siRNA (+) or control siRNA (-) into Hep3B cells. Results were confirmed with a second gp80 siRNA. **B.** gp130 mutants (Y186 and A418), wild type gp130 (Wt) or control expression vectors (EP) were co-transfected with gp80 (+) or control expression vector (-). Activation of STAT3 is shown by Luc activity (mean) determined from triplicate transfections ( $\pm$  SD) relative to pSIEM-luc alone (EP) with serum starvation. Where indicated, the cells were treated for 3 hr with 100 ng/ml IL6. \*,  $p < 0.05$ ; \*\*,  $p < 0.01$ ; \*\*\*,  $p < 0.001$ , two-tailed Student's  $t$  test.

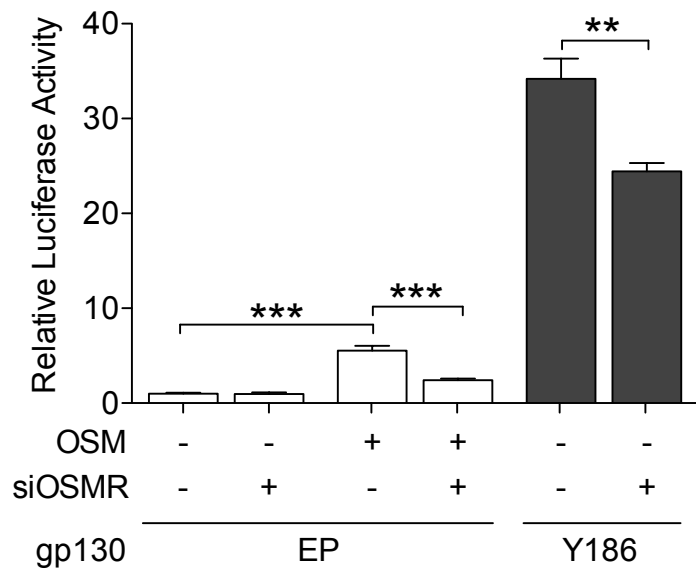

**Supplementary Figure S5. Role of OSMR on gp130 mutant activity in Huh7 hepatocellular cells.** Knockdown of OSMR in Huh7 cells impairs STAT3 activity induced by the Y186 active gp130 mutant or OSM treatment (100 ng/ml). The data show STAT3-luciferase activity (Luc) relative to cells transfected with the control pSIEM-Luc reporter alone (EP)  $\pm$  SD (transfections in triplicate). \*\*,  $p < 0.01$ ; \*\*\*,  $p < 0.001$ , two-tailed Student's *t* test.

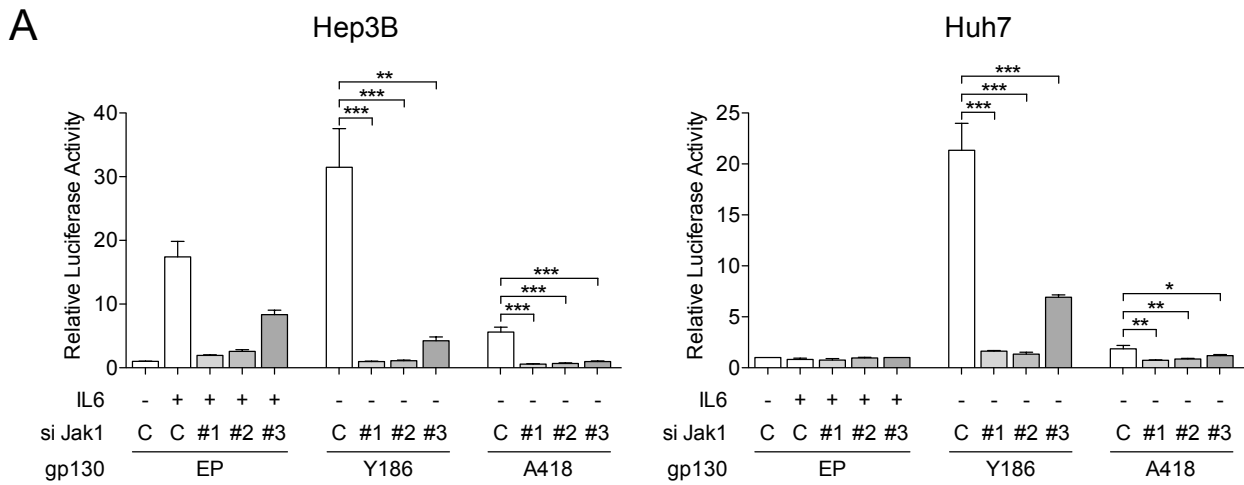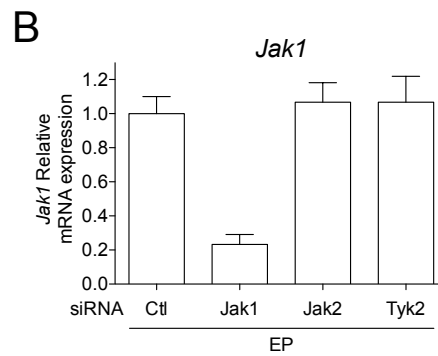

**Supplementary Figure S6. Role of JAK1 on gp130 mutants activation in two additional cell lines.** **A.** Hep3B (*left*) or Huh7 (*right*) cells were co-transfected with gp130 mutants (Y186 and A418) or control expression vector (EP) and with three different JAK1 siRNAs or control siRNA (C, white bars). Activation of STAT3 is shown by STAT3-Luc activity (mean) determined from triplicate transfections ( $\pm$  SD) relative to control-Luc (pSIEM-Luc, EP) following serum starvation. **B.** Knockdown efficiency by JAK1 siRNA and specificity of Jak2 and Tyk2 siRNA. Hep3B cells were co-transfected with empty vector (EP) and either control (Ctl), Jak1, Jak2 or Tyk2 siRNA. Shown is the endogenous Jak1 mRNA expression determined from triplicate transfections ( $\pm$  SD) relative to EP with serum starvation. Remaining Jak1 expression in Jak1 siRNA transfected cells was <25% of control. Where indicated, cells were treated for 3 hr with 100 ng/ml IL6. \*,  $p < 0.05$ ; \*\*,  $p < 0.01$ ; \*\*\*,  $p < 0.001$ , two-tailed Student's *t* test.

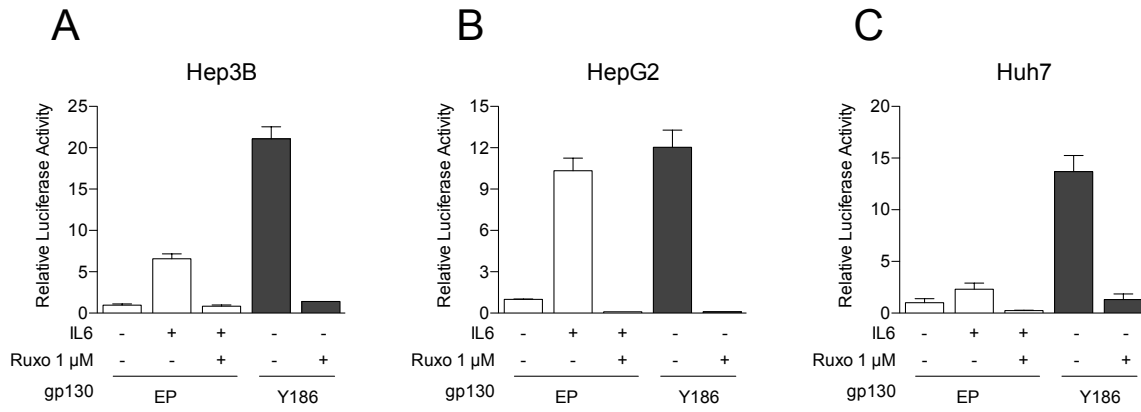

**Supplementary Figure S7. Effect of Ruxolitinib on gp130 mutant activation in hepatocellular cell lines.** Hep3B (A), HepG2 (B) or Huh7 (C) cells expressing gp130 mutant (Y186) or control expression vector (EP) were treated with Ruxolitinib (Ruxo; 1  $\mu$ M, 16 hr) and IL6 (100 ng/ml, 3 hr). Activation of the STAT3 Luc reporter was determined from triplicate transfections ( $\pm$  SD) relative to Hep3B cells transfected with the control pSIEM-Luc reporter (EP) following serum starvation.

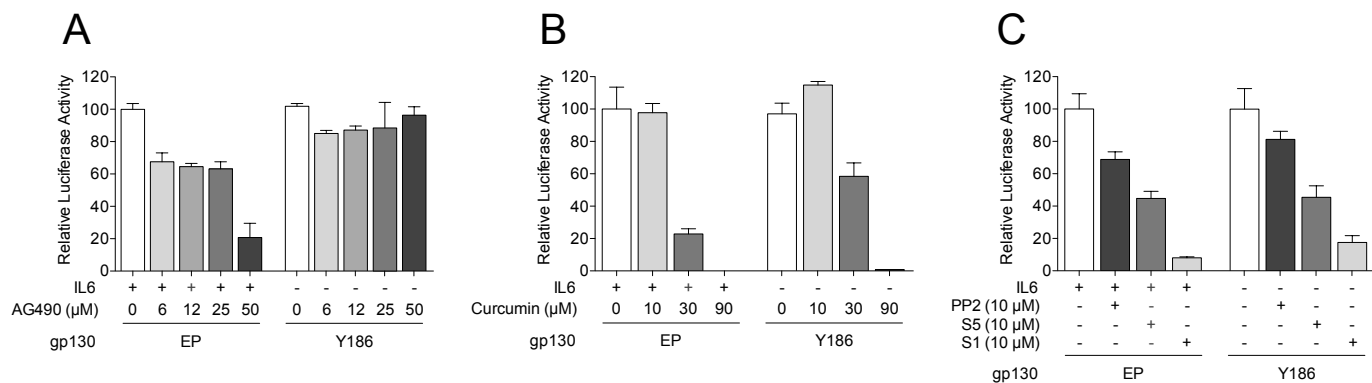

**Supplementary Figure S8. Effect of different JAK/STAT inhibitors on gp130 mutant activity.** Hep3B cells transfected with gp130 mutant (Y186) or control plasmid treated with 100 ng/ml of IL6 (EP) were exposed to increasing concentrations of AG490 for 16 hr (A), or to increasing concentrations of Curcumin for 9 hr (B). The data shows STAT3 Luc reporter activity relative to transfected cells not treated with the inhibitor. C. Hep3B cells transfected with gp130 mutant (Y186) or control plasmid treated with 100 ng/ml of IL6 (EP) were treated with 10μM of Src inhibitor 1 (S1), Src inhibitor 5 (S5) or PP2 for 10 hr. The graph plots STAT3 Luc activity relative to the transfected cells not treated with the inhibitor. All results are from triplicate transfections (± SD) relative to cells transfected with control luciferase reporter (pSIEM-luc, EP) with serum starvation.
